# Supplementary material for: A promising Prognostic risk model for advanced renal cell carcinoma (RCC) with immune-related genes
Source: PubMed Central journal article supplement (PMC9229885; doi:10.1186/s12885-022-09755-2), 2022-06-23

**a**

Early Renal cell carcinoma

|                                         | DFS     |           |            |         | OS    |           |            |         | DFS   | OS |  |
|-----------------------------------------|---------|-----------|------------|---------|-------|-----------|------------|---------|-------|----|--|
|                                         | HR      | Low 95%CI | High 95%CI | P value | HR    | Low 95%CI | High 95%CI | P value |       |    |  |
| <b>HLA</b>                              | HLA-A   | 1.272     | 0.923      | 1.753   | 0.142 | 0.91      | 0.542      | 1.53    | 0.723 |    |  |
|                                         | HLA-B   | 1.075     | 0.791      | 1.46    | 0.644 | 0.833     | 0.488      | 1.424   | 0.504 |    |  |
| <b>IFN-gamma signature</b>              | IDO1    | 1.106     | 0.937      | 1.307   | 0.234 | 1.385     | 1.024      | 1.874   | 0.035 |    |  |
|                                         | CXCL10  | 1.01      | 0.879      | 1.161   | 0.884 | 1.131     | 0.88       | 1.455   | 0.336 |    |  |
|                                         | CXCL9   | 1.087     | 0.952      | 1.241   | 0.216 | 1.172     | 0.926      | 1.482   | 0.186 |    |  |
|                                         | HLA-DRA | 1.131     | 0.94       | 1.361   | 0.192 | 1.14      | 0.816      | 1.594   | 0.443 |    |  |
|                                         | IFNG    | 1.283     | 0.805      | 2.046   | 0.294 | 1.215     | 0.52       | 2.838   | 0.653 |    |  |
|                                         | TNFRSF8 | 1.264     | 0.382      | 4.179   | 0.701 | 2.57      | 0.509      | 12.98   | 0.253 |    |  |
| <b>Extended immune gene signature</b>   | CIITA   | 1.159     | 0.825      | 1.629   | 0.394 | 1.468     | 0.815      | 2.644   | 0.201 |    |  |
|                                         | CD3E    | 1.19      | 0.981      | 1.445   | 0.078 | 1.236     | 0.873      | 1.749   | 0.232 |    |  |
|                                         | CCL5    | 1.154     | 0.976      | 1.363   | 0.093 | 1.213     | 0.899      | 1.636   | 0.206 |    |  |
|                                         | GZMK    | 1.104     | 0.937      | 1.302   | 0.238 | 1.102     | 0.82       | 1.48    | 0.521 |    |  |
|                                         | CD2     | 1.162     | 0.971      | 1.39    | 0.102 | 1.21      | 0.875      | 1.673   | 0.249 |    |  |
|                                         | CXCL13  | 1.296     | 1.074      | 1.563   | 0.007 | 1.494     | 1.1        | 2.03    | 0.01  |    |  |
|                                         | NKG7    | 1.094     | 0.935      | 1.28    | 0.261 | 1.116     | 0.843      | 1.477   | 0.444 |    |  |
|                                         | HLA-E   | 1.026     | 0.77       | 1.367   | 0.86  | 0.887     | 0.536      | 1.467   | 0.641 |    |  |
|                                         | CXCR6   | 1.273     | 0.892      | 1.816   | 0.184 | 1.429     | 0.758      | 2.693   | 0.27  |    |  |
|                                         | LAG3    | 1.145     | 0.912      | 1.439   | 0.244 | 1.204     | 0.815      | 1.779   | 0.352 |    |  |
| <b>Cytotoxic T lymphocyte signature</b> | TAGAP   | 0.904     | 0.657      | 1.245   | 0.537 | 0.837     | 0.462      | 1.518   | 0.558 |    |  |
|                                         | STAT1   | 1.331     | 1.051      | 1.686   | 0.018 | 1.285     | 0.831      | 1.986   | 0.26  |    |  |
|                                         | GZMB    | 1.234     | 0.96       | 1.586   | 0.101 | 1.582     | 1.026      | 2.438   | 0.038 |    |  |
|                                         | CD8A    | 1.14      | 0.966      | 1.345   | 0.122 | 1.154     | 0.861      | 1.548   | 0.337 |    |  |
|                                         | CD8B    | 1.164     | 0.944      | 1.437   | 0.156 | 1.142     | 0.782      | 1.669   | 0.491 |    |  |
|                                         | GZMA    | 1.079     | 0.905      | 1.286   | 0.395 | 1.168     | 0.855      | 1.597   | 0.33  |    |  |
| PRF1                                    | 1.079   | 0.877     | 1.326      | 0.473   | 1.179 | 0.818     | 1.7        | 0.377   |       |    |  |

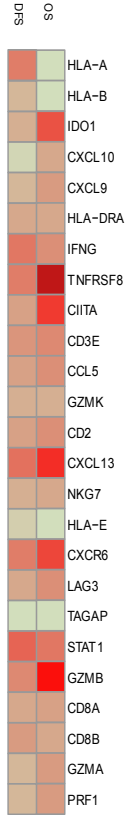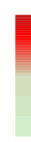**b**

Advanced Renal cell carcinoma

|                                         | DFS     |           |            |         | OS    |           |            |         | DFS   | OS |  |
|-----------------------------------------|---------|-----------|------------|---------|-------|-----------|------------|---------|-------|----|--|
|                                         | HR      | Low 95%CI | High 95%CI | P value | HR    | Low 95%CI | High 95%CI | P value |       |    |  |
| <b>HLA</b>                              | HLA-A   | 1.019     | 0.83       | 1.251   | 0.86  | 0.985     | 0.767      | 1.266   | 0.907 |    |  |
|                                         | HLA-B   | 0.955     | 0.786      | 1.161   | 0.647 | 0.853     | 0.68       | 1.07    | 0.169 |    |  |
| <b>IFN-gamma signature</b>              | IDO1    | 1.024     | 0.911      | 1.151   | 0.688 | 0.934     | 0.811      | 1.076   | 0.344 |    |  |
|                                         | CXCL10  | 1.021     | 0.925      | 1.127   | 0.685 | 1.001     | 0.888      | 1.129   | 0.982 |    |  |
|                                         | CXCL9   | 1.026     | 0.936      | 1.124   | 0.586 | 0.984     | 0.881      | 1.098   | 0.77  |    |  |
|                                         | HLA-DRA | 0.969     | 0.867      | 1.083   | 0.576 | 0.881     | 0.774      | 1.003   | 0.056 |    |  |
|                                         | IFNG    | 1.07      | 0.826      | 1.387   | 0.609 | 1.133     | 0.844      | 1.522   | 0.405 |    |  |
|                                         | TNFRSF8 | 1.961     | 1.145      | 3.361   | 0.014 | 2.546     | 1.38       | 4.698   | 0.003 |    |  |
| <b>Extended immune gene signature</b>   | CIITA   | 0.898     | 0.716      | 1.125   | 0.349 | 0.837     | 0.636      | 1.101   | 0.204 |    |  |
|                                         | CD3E    | 1.035     | 0.918      | 1.167   | 0.577 | 0.996     | 0.86       | 1.154   | 0.96  |    |  |
|                                         | CCL5    | 1.075     | 0.969      | 1.193   | 0.172 | 1.056     | 0.93       | 1.199   | 0.404 |    |  |
|                                         | GZMK    | 1.005     | 0.906      | 1.114   | 0.926 | 0.978     | 0.862      | 1.11    | 0.734 |    |  |
|                                         | CD2     | 1.03      | 0.922      | 1.15    | 0.601 | 0.984     | 0.859      | 1.127   | 0.814 |    |  |
|                                         | CXCL13  | 1.156     | 1.037      | 1.287   | 0.009 | 1.177     | 1.041      | 1.331   | 0.009 |    |  |
|                                         | NKG7    | 1.053     | 0.951      | 1.167   | 0.318 | 1.014     | 0.895      | 1.15    | 0.827 |    |  |
|                                         | HLA-E   | 0.975     | 0.803      | 1.184   | 0.796 | 0.856     | 0.682      | 1.076   | 0.182 |    |  |
|                                         | CXCR6   | 1.027     | 0.832      | 1.267   | 0.807 | 1.028     | 0.795      | 1.329   | 0.832 |    |  |
|                                         | LAG3    | 1.078     | 0.942      | 1.234   | 0.272 | 1.088     | 0.927      | 1.276   | 0.302 |    |  |
| <b>Cytotoxic T lymphocyte signature</b> | TAGAP   | 0.821     | 0.656      | 1.028   | 0.086 | 0.812     | 0.617      | 1.069   | 0.137 |    |  |
|                                         | STAT1   | 1.092     | 0.927      | 1.285   | 0.292 | 1.075     | 0.881      | 1.311   | 0.475 |    |  |
|                                         | GZMB    | 1.249     | 1.047      | 1.49    | 0.014 | 1.172     | 0.956      | 1.437   | 0.126 |    |  |
|                                         | CD8A    | 1.014     | 0.911      | 1.129   | 0.801 | 0.988     | 0.867      | 1.125   | 0.851 |    |  |
|                                         | CD8B    | 1.008     | 0.877      | 1.159   | 0.906 | 0.977     | 0.825      | 1.156   | 0.784 |    |  |
|                                         | GZMA    | 1.03      | 0.925      | 1.148   | 0.59  | 0.986     | 0.863      | 1.125   | 0.83  |    |  |
| PRF1                                    | 1.022   | 0.889     | 1.175      | 0.756   | 0.951 | 0.801     | 1.128      | 0.561   |       |    |  |

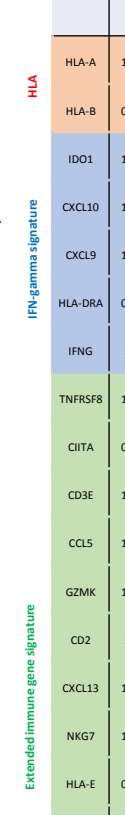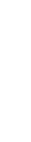

Supplement: 12885_2022_9755_MOESM1_ESM.pdf [file 12885_2022_9755_MOESM1_ESM.pdf]
