# Supplementary material for: A promising Prognostic risk model for advanced renal cell carcinoma (RCC) with immune-related genes
Source: PubMed Central journal article supplement (PMC9229885; doi:10.1186/s12885-022-09755-2), 2022-06-23

Supplementary figure 2: The survival plot showed CSS of high-risk and low-risk groups in metastatic RCC.

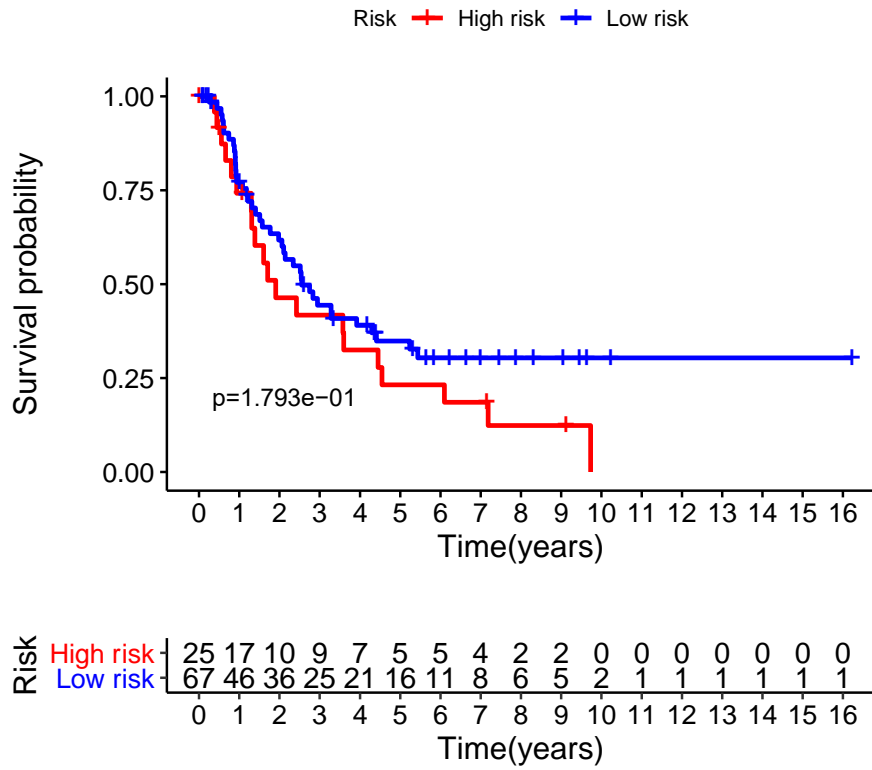

Supplement: 12885_2022_9755_MOESM2_ESM.pdf [file 12885_2022_9755_MOESM2_ESM.pdf]
